# Supplementary material for: Combined electrical-electrochemical phenotypic profiling of antibiotic susceptibility of in vitro biofilm models
Source: Royal Society of Chemistry journal article supplement (doi:10.1039/d4an00393d), 2024-01-01
Supplement: d4an00393d1.pdf [file d4an00393d1.pdf]

## Supporting Information

### **Combined Electrical-Electrochemical Phenotypic Profiling of Antibiotic Susceptibility of *In Vitro* Biofilm Models**

*Zahra Rafiee<sup>1</sup>, Maryam Rezaie<sup>1</sup>, and Seokheun Choi<sup>1,2\*</sup>*

<sup>1</sup>Bioelectronics & Microsystems Laboratory, Department of Electrical & Computer Engineering, State University of New York at Binghamton, Binghamton, New York, 13902, USA

<sup>2</sup>Center for Research in Advanced Sensing Technologies & Environmental Sustainability, State University of New York at Binghamton, Binghamton, New York, 13902, USA

\*Corresponding Author. Email: [sechoi@binghamton.edu](mailto:sechoi@binghamton.edu)

Lab website: <http://ws.binghamton.edu/choi/>

Center website: <http://www.ws.binghamton.edu/creates/>

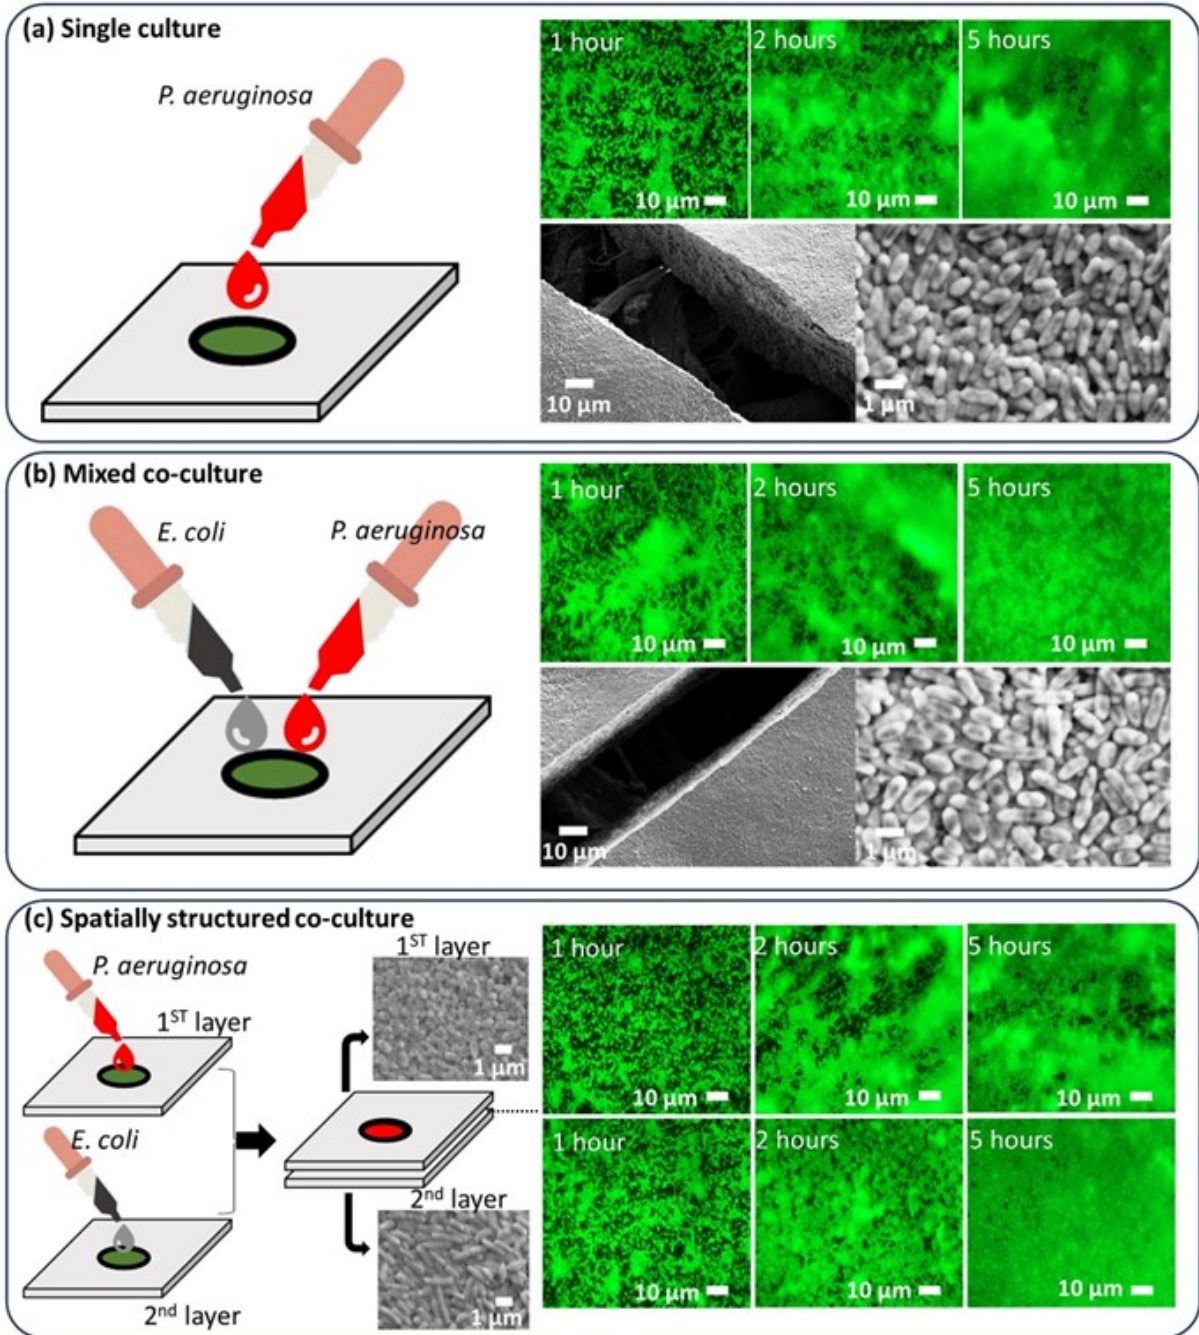

Figure S1. (a) Illustration of the paper-based culture platform to form a *P. aeruginosa* biofilm, fluorescence microscopic images of the biofilm formed for 1 hour, 2 hours, and 5 hours, and SEM images of the biofilm at  $t = 5$  hours with different magnitude. (b) Illustration of the paper-based culture platform to form a mixed *P. aeruginosa* and *E. coli* biofilm, fluorescence microscopic images of the biofilm formed for 1 hour, 2 hours, and 5 hours, and SEM images of the biofilm at  $t = 5$  hours with different magnitude. (c) Illustration of the two-layer paper-based culture platform to form a spatially engineered *P. aeruginosa* and *E. coli* biofilm (*P. aeruginosa* on the top layer and *E. coli* on the bottom layer), fluorescence microscopic images of the biofilm formed for 1 hour, 2 hours, and 5 hours, and SEM images of the biofilm at  $t = 5$  hours.

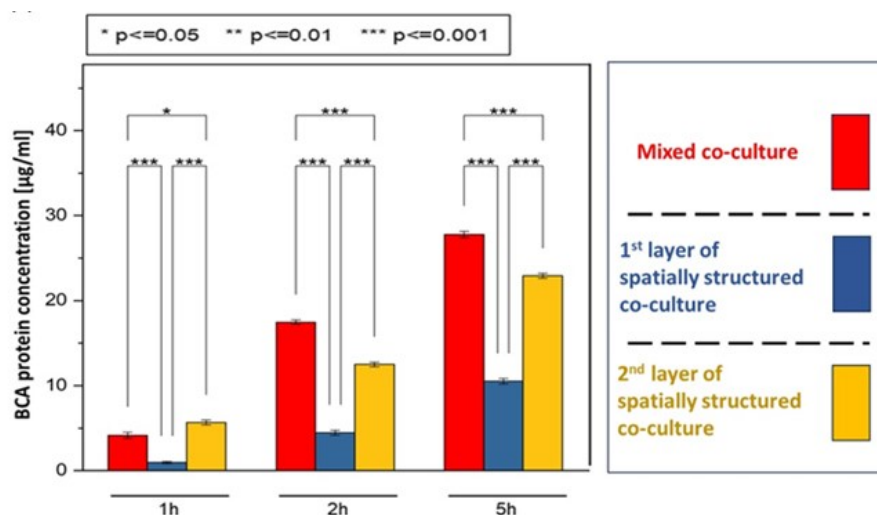

Figure S2. Quantification of bacterial biofilm formation over time by using a BCA protein assay kit. The mixed *P. aeruginosa* and *E. coli* biofilm, and the top and the bottom of the two-layered biofilm are characterized.

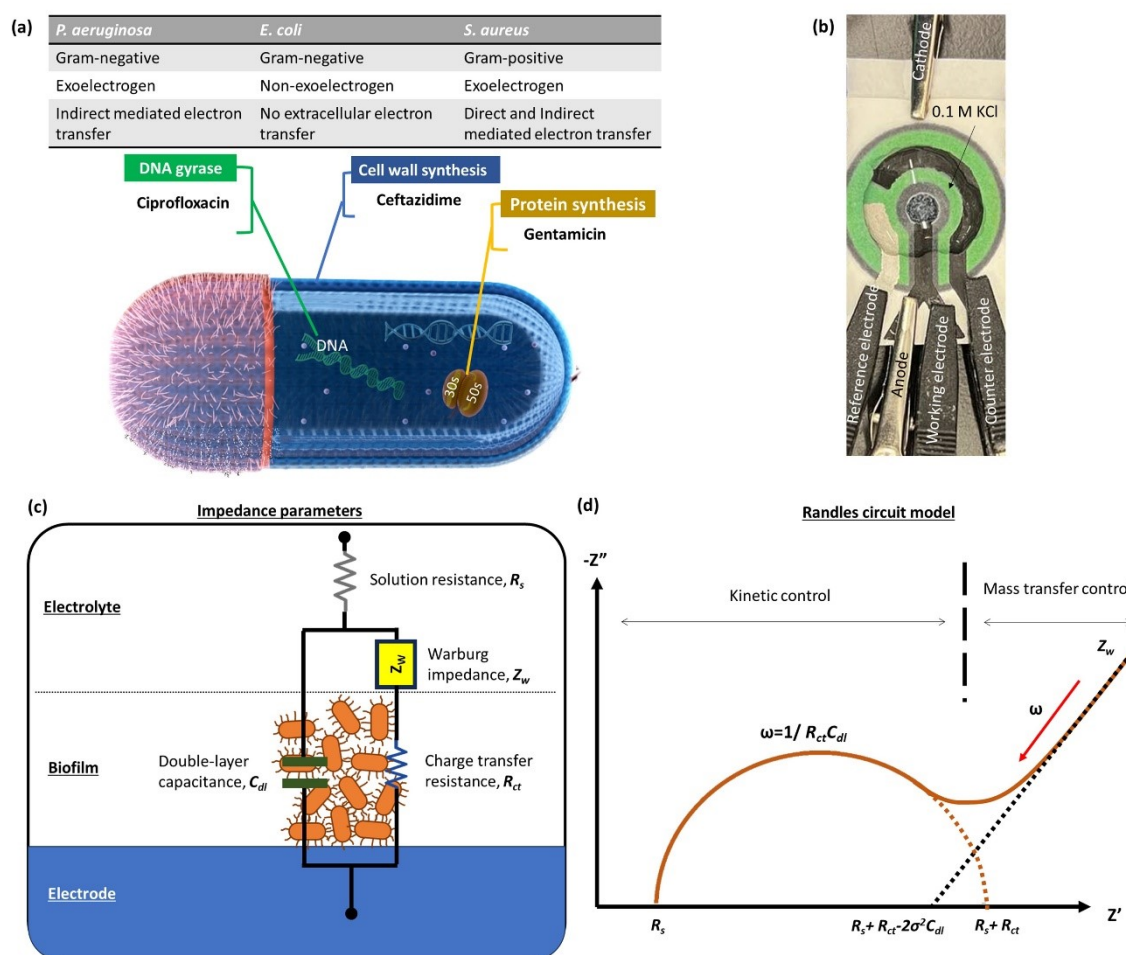

Figure S3. (a) Three pathogens against three frontline antibiotics tested in this work. (b) Test setup for the combined MFC-EIS measurements, (c) Schematic illustration demonstrating the impedance signature of a given microbe-electrode interface, and (d) the Randles' equivalent circuit model

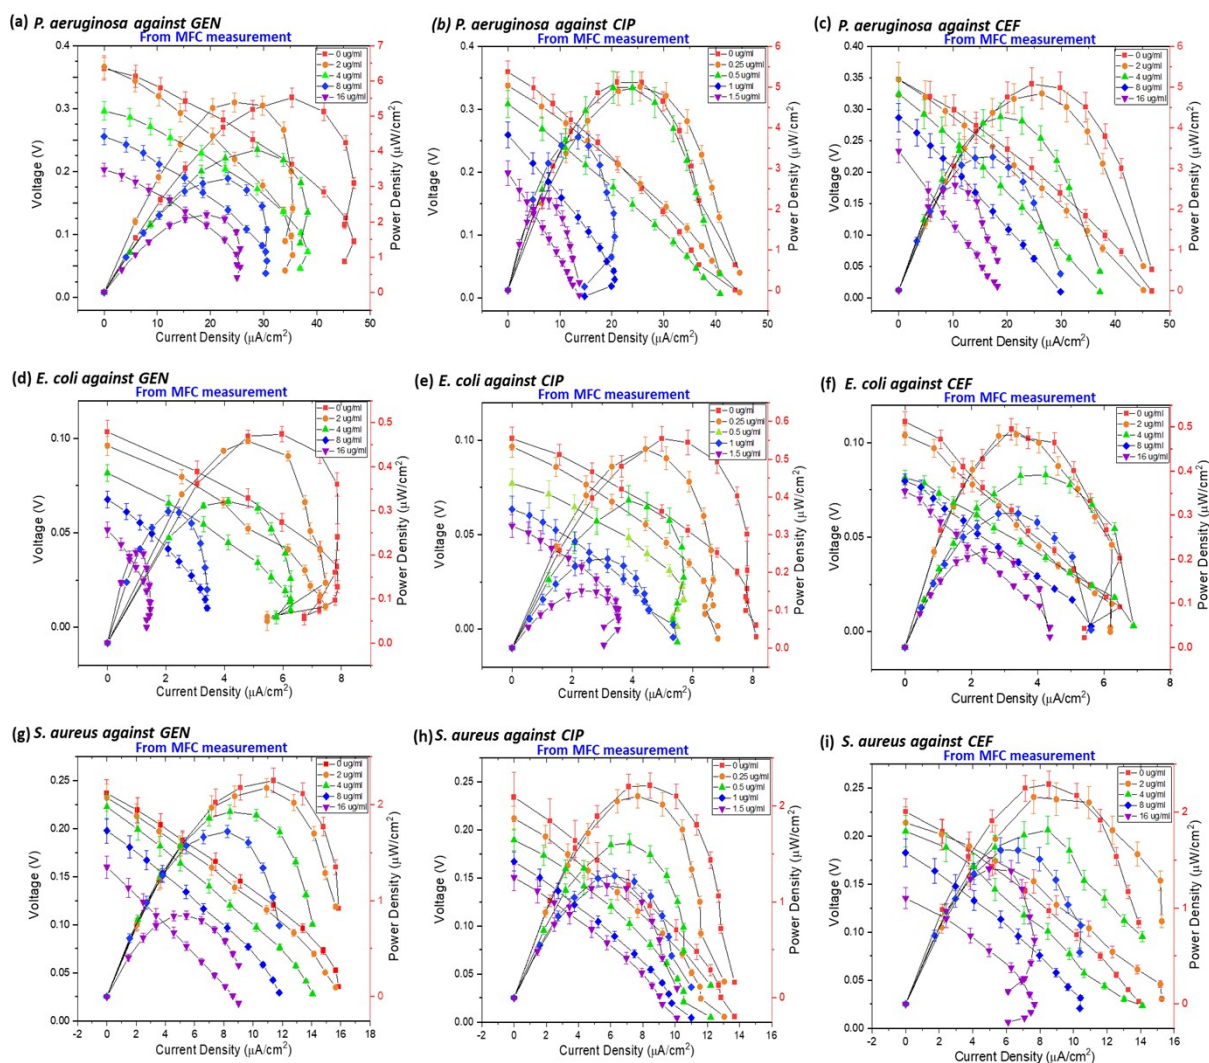

Figure S4. MFC measurements generating I-V and I-P curves for (a) *P. aeruginosa* biofilm against GEN, (b) *P. aeruginosa* biofilm against CIP, (c) *P. aeruginosa* biofilm against CEF, (d) *E. coli* against GEN, (e) *E. coli* against CIP, (f) *E. coli* against CEF, (g) *S. aureus* against GEN, (h) *S. aureus* against CIP, and (i) *S. aureus* against CEF.

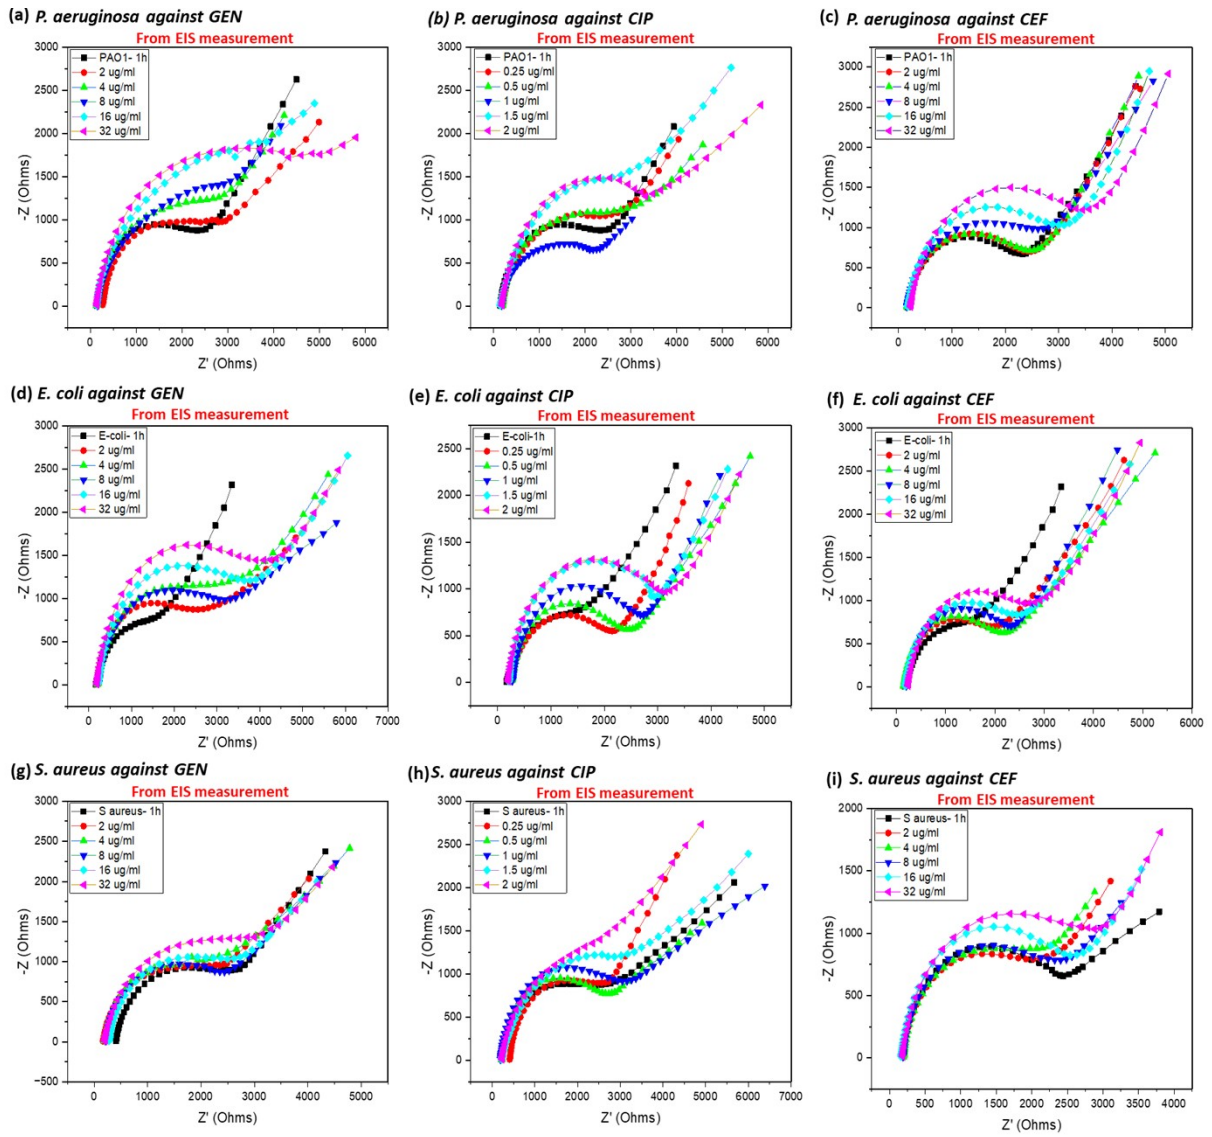

Figure S5. EIS measurements generating Nyquist impedance plots for (a) *P. aeruginosa* biofilm against GEN, (b) *P. aeruginosa* biofilm against CIP, (c) *P. aeruginosa* biofilm against CEF, (d) *E. coli* against GEN, (e) *E. coli* against CIP, (f) *E. coli* against CEF, (g) *S. aureus* against GEN, (h) *S. aureus* against CIP, and (i) *S. aureus* against CEF.

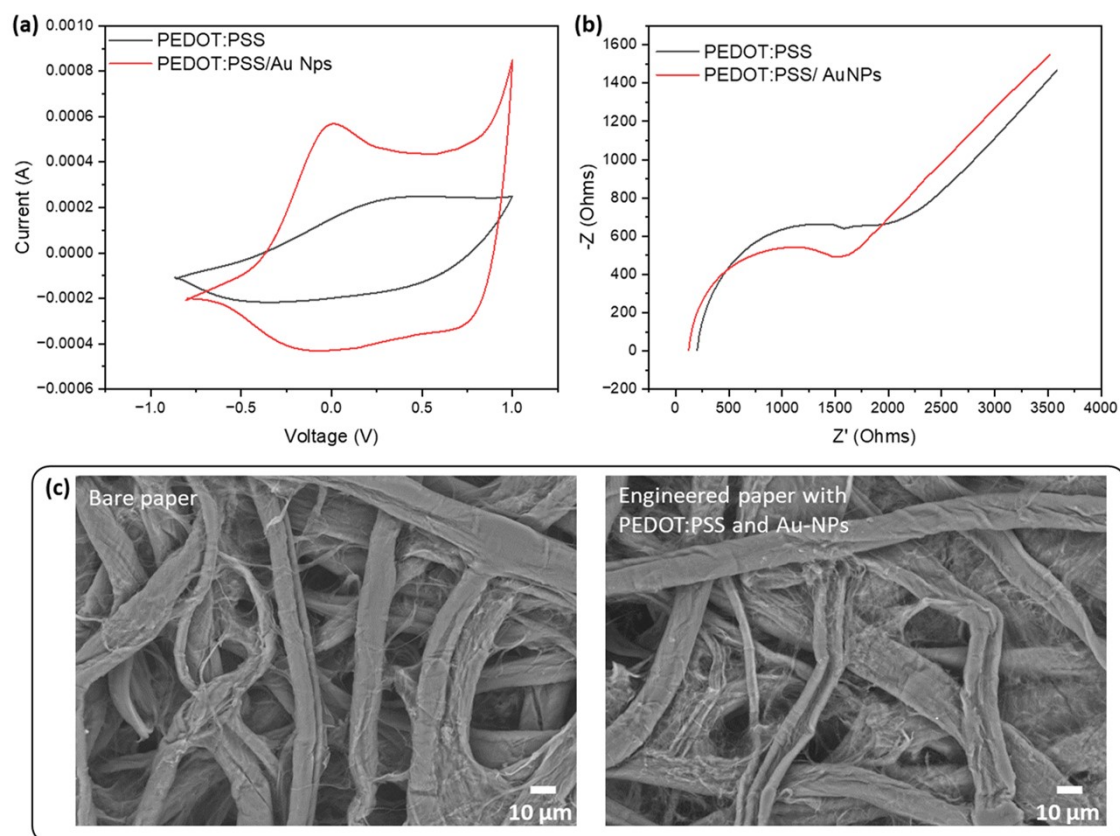

Figure S6. (a) Cyclic voltammetric profiles and (b) EIS spectra of the engineered paper with PEDOT:PSS only and a mixture of PEDOT:PSS and Au-NPs. (c) SEM images of the bare and engineered papers with PEDOT:PSS and Au-NPs.

Table S1. Acceptable MIC ranges given by the CLSI guidelines (<https://clsi.org/>)

|                     | <i>P. aeruginosa</i> | <i>E. coli</i>       | <i>S. aureus</i>   |
|---------------------|----------------------|----------------------|--------------------|
| Gentamicin (GEN)    | 4 $\mu\text{g/ml}$   | 4 $\mu\text{g/ml}$   | 4 $\mu\text{g/ml}$ |
| Ciprofloxacin (CIP) | 0.5 $\mu\text{g/ml}$ | 0.5 $\mu\text{g/ml}$ | 1 $\mu\text{g/ml}$ |
| Ceftazidime (CEF)   | 8 $\mu\text{g/ml}$   | 2 $\mu\text{g/ml}$   | 4 $\mu\text{g/ml}$ |
